# Supplementary material
Source: Research Square preprint supplement (doi:10.21203/rs.3.rs-8726989/v1)
Supplement: Supplementary file 1 [file c5fab8092fcada90d2ab0eb8.docx]

**1. How would you rate your current communication skills in interactions with patients?**

| Very poor | Poor | Adequate | Good | Very good |
| --- | --- | --- | --- | --- |

**2. How often do you reflect on your own emotions and reactions during conversations with patients or colleagues?**

| Never | Rarely | Sometimes | Often | Very often |
| --- | --- | --- | --- | --- |

**3. How confident do you feel when expressing your thoughts and feelings in conversations with patients?**

| Not confident at all | Slightly confident | Moderately confident | Confident | Very confident |
| --- | --- | --- | --- | --- |

**4. How would you rate your ability to resolve interpersonal conflicts (e.g., with a patient or colleague)?**

| Very poor | Poor | Adequate | Good | Very good |
| --- | --- | --- | --- | --- |

**5. Do you feel that you have sufficient knowledge and skills to cope with emotionally challenging situations in relationships with patients?**

| Strongly disagree | Disagree | Neither agree nor disagree | Agree | Strongly agree |
| --- | --- | --- | --- | --- |

**6. In your opinion, how important is interpersonal communication in a physician’s work?**

| Not important at all | Slightly important | Moderately important | Important | Very important |
| --- | --- | --- | --- | --- |

**7. How would you rate your assertiveness in communication with others (patients or colleagues)?**

| Very low | Low | Moderate | High | Very high |
| --- | --- | --- | --- | --- |

**8. How would you assess your interest in developing communication skills in the context of medical practice?**

| Very low | Low | Moderate | High | Very high |
| --- | --- | --- | --- | --- |

**9. In your view, how important are communication skills in a physician’s work compared with theoretical knowledge and clinical skills?**

| Much less important | Less important | Equally important | More important | Much more important |
| --- | --- | --- | --- | --- |

**10. Do you believe that interpersonal communication is a key factor in building relationships with patients?**

| Strongly disagree | Disagree | Neither agree nor disagree | Agree | Strongly agree |
| --- | --- | --- | --- | --- |
